# Supplementary material for: Heterozygous Pitx2 Null Mice Accurately Recapitulate the Ocular Features of Axenfeld-Rieger Syndrome and Congenital Glaucoma
Source: PubMed Central journal article supplement — Invest Ophthalmol Vis Sci. 2016 Sep;57(11):5023–30. doi: 10.1167/iovs.16-19700 (PMC5040192; doi:10.1167/iovs.16-19700), 2016-09
Supplement: iovs-57-12-13_s01.pdf [file iovs-57-12-13_s01.pdf]

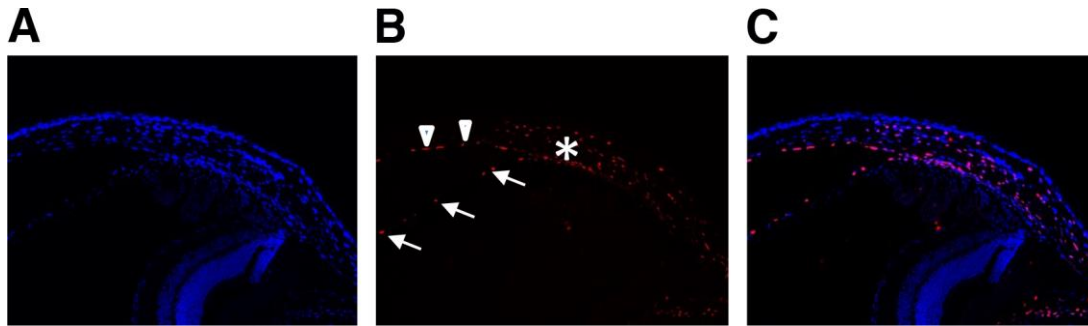

**Supplemental Figure 1: Pitx2 expression pattern in adult eyes.**

Paraffin sections of 2-week-old wild type were immunostained (red) to detect PITX2 and sections were counterstained with DAPI to detect nuclei (A). PITX2 was detected in the corneal endothelium (B, arrow heads), anterior iris (arrows) and iridocorneal angle (star). (C) Merge of A and B.

**Supplemental Tables:**

Supplemental Table 1: IOP distribution analysis in controls and mutants at three time points

|        | WT          |            |              | Mutant     |             |             |
|--------|-------------|------------|--------------|------------|-------------|-------------|
|        | 3 weeks     | 2 months   | 4 months     | 3 weeks    | 2 months    | 4 months    |
| IOP<20 | 18/20 (90%) | 24/25(96%) | 25/25 (100%) | 5/13 (28%) | 17/32 (53%) | 13/23 (57%) |
| IOP≥20 | 2/20 (10%)  | 1/25 (4%)  | 0/25 (0%)    | 13 (72%)   | 15/32 (47%) | 10/23 (43%) |

Supplemental Table 2: Grade distribution of optic nerve degeneration in WT and mutants at three weeks and two months.

|     | 3 Weeks    |            |           |            | 2 Months   |            |            |            |
|-----|------------|------------|-----------|------------|------------|------------|------------|------------|
|     | Grade 0    | Grade 1    | Grade 2   | Grade 3    | Grade 0    | Grade 1    | Grade 2    | Grade 3    |
| WT  | 8/12 (67%) | 4/12 (33%) | 0/12 (0%) | 0/12 (0%)  | 8/8 (100%) | 0/8 (0%)   | 0/8 (0%)   | 0/8 (0%)   |
| Mut | 3/13 (23%) | 4/13 (31%) | 1/13 (8%) | 5/13 (38%) | 0/14 (0%)  | 6/14 (43%) | 2/14 (14%) | 6/14 (43%) |
